1 **Comparison of three TaqMan Real-Time Reverse Transcription-PCR**  
2 **assays in detecting SARS-CoV-2**

3

4 Running title: Comparison of 3 qRT-PCR assays detecting SARS-CoV-2

5

6 Yan Xiao <sup>1#</sup>, Zhen Li <sup>2#</sup>, Xinming Wang <sup>1</sup>, Yingying Wang <sup>1</sup>, Ying Wang <sup>1</sup>, Geng Wang  
7 <sup>1</sup>, Lili Ren <sup>1,3\*</sup>, Jianguo Li <sup>2\*</sup>

8

9 1 National Health Commission Key Laboratory of Systems Biology of Pathogens and  
10 Christophe Mérieux Laboratory, Institute of Pathogen Biology, Chinese Academy of  
11 Medical Sciences & Peking Union Medical College, Beijing 100730, P. R. China.

12

13 2 Institutes of Biomedical Sciences, Shanxi University, Taiyuan, 030006, P. R. China.

14

15 3 Key Laboratory of Respiratory Disease Pathogenomics, Chinese Academy of  
16 Medical Sciences and Peking Union Medical College, Beijing, 100730, P. R. China.

17

18 <sup>#</sup>These authors contributed equally to this work

19

20 **\*Corresponding author**

21 Dr. Jianguo Li

22 No. 92 Wucheng Road, Xiaodian District, Taiyuan 030006, P.R. China

23 Email: lijg@sxu.edu.cn

24 Tel/Fax: 86-351-7018958

25 **Co-corresponding author:**

26 **Dr Lili Ren**

27 No.9 Dong Dan San Tiao, Dongcheng District,

28 Beijing 100730, P. R. China

29 E-mail: renliliipb@163.com

30 Tel/Fax: 86-10-67855226

31

32 Abstract word count: 246

33 Text word count: 2037

34 **Abstract**

35 Quick and accurate detection of SARS-CoV-2 is critical for COVID-19 control.  
36 Dozens of real-time reverse transcription PCR (qRT-PCR) assays have been  
37 developed to meet the urgent need of COVID-19 control. However, methodological  
38 comparisons among the developed qRT-PCR assays are limited. In the present study,  
39 we evaluated the sensitivity, specificity, amplification efficiency, and linear detection  
40 ranges of three qRT-PCR assays, including the assays developed by our group  
41 (IPBCAMS), and the assays recommended by WHO and China CDC (CCDC). The  
42 three qRT-PCR assays exhibited similar sensitivities, with the limit of detection (LOD)  
43 at about 10 copies per reaction (except the ORF 1b gene assay in CCDC assays with a  
44 LOD at about 100 copies per reaction). No cross reaction with other respiratory  
45 viruses were observed in all of the three qRT-PCR assays. Wide linear detection  
46 ranges from  $10^6$  to  $10^1$  copies per reaction and acceptable reproducibility were  
47 obtained. By using 25 clinical specimens, the N gene assay of IPBCAMS assays and  
48 CCDC assays performed better (with detection rates of 92% and 100%, respectively)  
49 than that of the WHO assays (with a detection rate of 60%), and the ORF 1b gene  
50 assay in IPBCAMS assays performed better (with a detection rate of 64%) than those  
51 of the WHO assays and the CCDC assays (with detection rates of 48% and 20%,  
52 respectively). In conclusion, the N gene assays of CCDC assays and IPBCAMS  
53 assays and the ORF 1b gene assay of IPBCAMS assays were recommended for  
54 qRT-PCR screening of SARS-CoV-2.

55 **Key words:** SARS-CoV-2; qRT-PCR; methodological evaluation; Limit of Detection;  
56 reproductivity, clinical performance

## 57 **Introduction**

58 Since the first detection in late 2019, severe respiratory syndrome CoV-2  
59 (SARS-CoV-2) caused Corona Virus Infectious Disease in 2019 (COVID-19) has  
60 widely spread in the world. By April 11, 2020, more than 1.7 million patients infected  
61 by SARS-CoV-2 has been reported from 185 countries (1). Given the quick increase  
62 in confirmed cases and asymptomatic infections, there are increasing demands in  
63 diagnostic tools for quick and accurate detection of the virus (2, 3). Several real-time  
64 reverse transcription-Polymerase Chain Reaction (qRT-PCR) for the detection of  
65 SARS-COV-2 has been developed to meet the demands, including the assays by this  
66 group (IPBCAMS assays), and the assays by WHO (WHO assays), and the assays by  
67 China CDC (CCDC assays).

68 Because SARS-CoV-2 usually infected the lower respiratory tract, it is not easy to  
69 detect the viral nucleic acids from throat swabs with relatively lower viral load (4).  
70 Thus, qRT-PCR assays with higher sensitivity and better performance in the detection  
71 of SARS-CoV-2 is recommended in aiding the diagnosis of COVID-19 (2). However,  
72 most of the current available qRT-PCR assays were developed for emergency, a  
73 comprehensive methodological comparison among these assays remains unfulfilled.  
74 To comprehensively compare the performance of currently available qRT-PCR assays  
75 for detection of SARS-CoV-2, we evaluated the sensitivity, specificity, amplification  
76 efficiency, and linear detection ranges among IPBCAMS assays, WHO assays and  
77 CCDC assays.

## 78 **Materials and methods**

### 79 **Nucleic acid extraction**

80 Nucleic acids were extracted from a volume of 200 µl clinical samples by using  
81 NucliSens easyMag apparatus (bioMe´rieux, MarcyL'Etoile, France) according to the  
82 manufacturer's instructions. A volume of 50 µl total nucleic acid eluate for each  
83 specimen was recovered and transferred into a nuclease-free vial and either tested  
84 immediately or stored at -80°C.

### 85 **Primers and probes**

86 Sequences of primers and probes for the IPBCAMS assays were recently developed  
87 (5), while those for the WHO assays were obtained from the website of WHO  
88 ([https://www.who.int/docs/default-source/coronaviruse/protocol-v2-1.pdf?sfvrsn=a9ef](https://www.who.int/docs/default-source/coronaviruse/protocol-v2-1.pdf?sfvrsn=a9ef618c_2)  
89 [618c\\_2](https://www.who.int/docs/default-source/coronaviruse/protocol-v2-1.pdf?sfvrsn=a9ef618c_2)), and those for the CCDC assays were obtained from the website of China  
90 CDC

91 ([http://www.chinacdc.cn/jkzt/crb/zl/szkb\\_11803/jszl\\_11815/202003/W020200309540](http://www.chinacdc.cn/jkzt/crb/zl/szkb_11803/jszl_11815/202003/W020200309540)  
92 843062947.pdf) (Table 1). Primers and probes were synthesized by standard  
93 phosphoramidite chemistry techniques at Qingke biotechnology Co. Ltd (Beijing,  
94 China). TaqMan probes were labeled with the molecule 6-carboxy-fluorescein (FAM)  
95 at the 5' end, and with the quencher Blackhole Quencher 1 (BHQ1) at the 3' end.  
96 Optimal concentrations of the primers and probes were determined by cross-titration  
97 of serial two-fold dilutions of each primer/probe against a constant amount of purified  
98 RNA of SARS-CoV-2.

#### 99 **TaqMan real-time RT-PCR assay**

100 The TaqMan real-time RT-PCR assays were performed by using TaqMan Fast Virus  
101 1-Step Master Mix (Thermo Fisher Scientific, MA, USA). Each 20  $\mu$ l reaction mix  
102 contained 5  $\mu$ l of 4 $\times$ Fast Virus 1-Step Master Mix, 0.2  $\mu$ l of 50  $\mu$ M probe, 0.2  $\mu$ l each  
103 of 50  $\mu$ M forward and reverse primers, 12.4  $\mu$ l of nuclease-free water, and 2  $\mu$ l of  
104 nucleic acid extract. Amplifications were carried out in 96-well plates by using  
105 Bio-Rad instrument (Bio-Rad CFX96, CA, USA). Thermo-cycling conditions are as  
106 follows: 15 min at 50 $^{\circ}$ C for reverse transcription, 4 min at 95 $^{\circ}$ C for pre-denaturation,  
107 followed by 45 cycles of 15 sec at 95 $^{\circ}$ C and 45 sec at 60 $^{\circ}$ C. Fluorescence  
108 measurements were taken at 60 $^{\circ}$ C of each cycle. The threshold cycle (Ct) value was  
109 determined by the point at which fluorescence exceeded a threshold limit set at the  
110 mean plus 10 standard deviations above the baseline. A result was considered positive if  
111 two or more of the SARS-CoV-2 genome targets exhibited positive results ( $Ct \leq 35$ ).  
112 A result of  $35 \leq Ct \leq 40$  was considered suspected and a repeat test was performed for  
113 result confirmation.

#### 114 **Preparation of RNA transcripts**

115 RNA transcripts for N gene and ORF 1b of SARS-CoV-2 were prepared with a  
116 plasmid pEasy-T1 (TransGen Biotech, Beijing, China) with T7 promoter before the  
117 multiple cloning sites. The plasmids inserted with viral gene regions of N and Orf1b  
118 were linearized with the restriction enzyme, BamHI, and transcribed *in-vitro* by using  
119 RiboMAX<sup>TM</sup> Large Scale RNA Production Systems (Promega, WI, USA),  
120 respectively. The concentrations of the RNA transcripts were determined by using  
121 NanoDrop (Thermo Fisher Scientific, CA, USA).

#### 122 **Results**

123 **Comparison of the sensitivities, reproducibility and linear detection ranges of the**  
124 **three qRT-PCR assays.**

125 To determine the sensitivity of the three qRT-PCR assays, we measured the limit of  
126 detection (LOD) for each assay by using RNA transcript of the corresponding gene in  
127 ten-fold dilution as template (RNA transcript alone). A LOD of 10 genomic copies per  
128 reaction was observed for both the N gene assay and the ORF 1b gene assay of all the  
129 three qRT-PCR assays, although the Ct values for N gene assay of WHO assays and  
130 ORF 1b gene assay of CCDC assays were higher than 35 cycles (Table 2).

131 The linear detection ranges of the three qRT-PCR assays were determined by using a  
132 ten-fold dilution of the RNA transcript as template. It showed that the Ct values  
133 increased with the RNA transcript from  $10^6$  to  $10^1$  copies in the reaction in all of the  
134 three qRT-PCR assays (Table 2). Strong linear correlations were observed between Ct  
135 values and quantity of RNA transcripts with  $r^2=0.9926, 0.9750, 0.9987$  in the N gene  
136 assay, and  $r^2=0.9953, 0.9897, 0.9941$  in the ORF 1b assay of IPBCAMS assays, WHO  
137 assays, and CCDC assays, respectively. These results suggested that all of the three  
138 qRT-PCR assays exhibited linear detection ranges from  $10^6$  to  $10^1$  copies per reaction,  
139 while the WHO assays showed lower coefficient of linear correlation.

140 The reproducibility of the three qRT-PCR assays was assessed by measuring  
141 coefficient of variation (CV) of mean Ct values in the intra- and inter- assay. For the  
142 N gene assay, the CVs of mean Ct values from  $10^6$  to  $10^1$  copies of RNA transcript per  
143 reaction were 0.20%-1.33%, 0.46%-5.09%, 0.27%-1.97% in intra-assay, and  
144 1.06%-2.45%, 0.96%-7.59%, 1.00%-5.51% in inter-assay of IPBCAMS assay, WHO  
145 assay, and CCDC assay, respectively. For the ORF 1b gene assay, the CVs of mean Ct  
146 values were 0.26%-4.45%, 0.29%-1.76%, 0.71%-6.52% in intra-assay, and  
147 2.17%-5.12%, 0.30-1.57%, 2.63%-4.34% in inter-assay of IPBCAMS assays, WHO  
148 assays, and CCDC assays, respectively.

149 Because co-infections of respiratory viruses are common, we prepared a (v:v=1:1)  
150 mixture of the RNA transcript and a pooled total nucleic acid extract from respiratory  
151 specimens (RNA transcript + other extract) as template, to evaluate the effect of  
152 co-existed viral nucleic acids on the performance of the assays. No effect of the  
153 co-existed other viral nucleic acids on the LOD and the linear detection range was  
154 observed, although higher Ct values were generated than those of RNA transcript  
155 alone as template in all of the three qRT-PCR assays. However, the co-existed other  
156 viral nucleic acids put some effect on the efficiencies of the three qRT-PCR assays.

157 For the N gene assays, the efficiencies were moved from 105.82%, 107.23%,  
158 102.21% to 110.17%, 124.32%, 119.43% in IPBCAMS assays, WHO assays, CCDC  
159 assays, respectively. For the ORF 1b assays, the efficiencies were moved from  
160 107.71%, 121.83%, 93.80% to 109.18%, 138.43%, 100.92% in IPBCAMS assays,  
161 WHO assays, CCDC assays, respectively.

### 162 **Comparison of the specificities of the three qRT-PCR assays**

163 To evaluate the potential cross-reactions with other human respiratory viruses, the  
164 three qRT-PCR assays were examined by using human respiratory samples as  
165 templates, which were positive for human coronaviruses (OC43, NL63, 229E, or  
166 HKU1), or Influenza viruses (A or B), or respiratory syncytial virus, or parainfluenza  
167 virus (1-4), or human metapneumovirus, or rhinovirus, or adenovirus, or bocavirus.  
168 No cross reaction was observed in all of the three qRT-PCR assays (data not shown),  
169 suggesting high specificity of the three qRT-PCR assays in detecting SARS-CoV-2.

### 170 **Assay evaluation with clinical specimens**

171 The three qRT-PCR assays were evaluated with 25 clinical specimens (including 13  
172 throat swabs and 12 sputum) from 25 suspected COVID-19 patients. SARS-CoV-2  
173 was detected from 92% (23/25), 60% (15/25), 100% (25/25) by the N gene assay, and  
174 from 64% (16/25), 48% (12/25), 20% (5/25) of all enrolled clinical specimens by the  
175 ORF 1b gene assay in IPBCAMS assays, WHO assays, CCDC assays, respectively  
176 (Table 4). With respect to the sputum, SARS-CoV-2 was detected from 100% (12/12),  
177 75% (8/12), 100% (12/12) of specimens by the N gene assay, and from 100% (12/12),  
178 75% (8/12), 41.7% (5/12) of specimens by the ORF 1b gene assay in in IPBCAMS  
179 assays, WHO assays, CCDC assays, respectively. About the throat swabs,  
180 SARS-CoV-2 was detected from 84.6% (11/13), 53.8% (7/13), 100% (12/12) of  
181 specimens by the N gene assay, and from 30.8% (4/13), 30.8% (4/13), 0% (0/13) of  
182 specimens by the ORF 1b gene assay in in IPBCAMS assays, WHO assays, CCDC  
183 assays, respectively. These results demonstrated that the N gene assay performed  
184 better than the corresponding ORF 1b gene assay of all the three qRT-PCR assays, the  
185 N gene assay in CCDC assays and ORF 1b gene assay in IPBCAMS assays  
186 performed better than the other assays.

### 187 **Discussion**

188 Rapid and accurate detection of SARS-CoV-2 represent a fast-growing global demand,  
189 which could be met by TaqMan real time RT-PCR (qRT-PCR). However, the current  
190 available TaqMan qRT-PCR assays for SARS-CoV-2 are varied in performance,

191 including sensitivity, specificity, reproducibility, linear detection ranges, etc. Due to  
192 that relative lower viral load in upper respiratory tract, reliable qRT-PCR assays for  
193 the detection of SARS-CoV-2 are required. We thus compared the performance of  
194 three currently wide-applied qRT-PCR assays in the detection of SARS-CoV-2.

195 Sensitivity is the primary demand in the detection of respiratory viruses (6). All of the  
196 three qRT-PCR assays could provide a LOD of 10 genomic copies per reaction with a  
197 detection range from  $10^6$ - $10^1$  genomic copies per reaction. The Ct value at 10  
198 genomic copies per reaction in the ORF 1b gene assay of CCDC assays was higher  
199 than 35. These results suggested that most of the three qRT-PCR assays provide high  
200 sensitivity and wide linear detection range in detecting SARS-CoV-2, except a  
201 relative lower sensitivity observed in the ORF 1b gene assay of CCDC assays.

202 Specificity is also essential in the detection of SARS-CoV-2, because of common  
203 co-infections with other respiratory viruses and high host DNA background in throat  
204 swabs (7-9). We evaluated the specificity of the three qRT-PCR assays with  
205 respiratory specimens positive for other common respiratory viruses. No cross  
206 reaction was observed, demonstrating high specificity of the three qRT-PCR assays in  
207 detection of SARS-CoV-2.

208 We next evaluated the reproducibility of the three qRT-PCR assays by measuring  
209 coefficient of variation (CV) of mean Ct values in intra- and inter- assay (10). The N  
210 gene assay in IPBCAMS assays and ORF 1b gene assay in WHO assays exhibited a  
211 relative better reproducibility with lower intra- and inter- assay CVs, which were not  
212 affected by the co-existed nucleic acids of other respiratory viruses.

213 Efficiency is another key parameter of qRT-PCR, reflecting the binding efficiency of  
214 primers & probe to template and the amplification efficiency of the PCR system(11).  
215 Most of the qRT-PCR assays provided good efficiency, except an abnormal efficiency  
216 of 121.83% observed in the ORF 1b gene assay of WHO assays. An exceptionally  
217 high efficiency indicates an increased risk of false positive (12). The co-existed  
218 nucleic acids of other respiratory viruses increased the efficiency of all the three  
219 qRT-PCR assays, suggesting potential increased risk of cross-reactions between the  
220 primers & probe and background nucleic acids.

221 We finally evaluate the performance of the three qRT-PCR assays with clinical  
222 specimens from suspected SARS-CoV-2 infected patients (13). Possibly because of  
223 the lower viral load in upper respiratory tract (4), the detection rate of SARS-CoV-2  
224 was lower in throat swabs than in sputum by all of the three assays. Meanwhile, the N

225 gene assay performed better than the corresponding ORF 1b gene assay in all of the  
226 three qRT-PCR assays. For the N gene assay, IPBCAMS assays and CCDC assays  
227 performed better than WHO assays, both of which could detect SARS-CoV-2 from  
228 more than 90% of the suspected specimens. For the ORF1b gene assay, IPBCAMS  
229 assays performed better than WHO assays and CCDC assays, with a detection rate of  
230 64%.

231 In conclusion, we performed methodological evaluations on three widely-applied  
232 qRT-PCR assays for the detection of SARS-CoV-2. Although most of the evaluated  
233 assays exhibited good sensitivity, specificity, reproducibility and wide linear detection  
234 range, performance test with clinical specimens from suspected COVID-19 patients  
235 suggested that the N gene assay in IPBCAMS assays and CCDC assays, and the ORF  
236 1b gene assays in IPBCAMS assays were the preferred qRT-PCR assays for accurate  
237 detection of SARS-CoV-2.

238

#### 239 **Data availability**

240 The original data will be available upon request.

241

#### 242 **Conflict of interest**

243 The authors declare that there are no conflicts of interest regarding the publication of  
244 this paper.

245

#### 246 **Acknowledgements**

247 We would like to thank the clinicians who contributed to sample collection and  
248 transportation. This study was funded in part by the Project from the Ministry of  
249 Science and Technology of China (2020YFC0841200), the National Major Science &  
250 Technology Project for Control and Prevention of Major Infectious Diseases of China  
251 (2017ZX10103004), the Chinese Academy of Medical Sciences (CAMS) Innovation  
252 Fund for Medical Sciences (2020HY320001), the key R&D plan of Shanxi Province  
253 (202003D31003/GZ) and the non-profit Central Research Institute Fund of Chinese  
254 Academy of Medical Sciences (2019PT310029).

255

256

257



**Table 1. Primers and probes of the three qRT-PCR assays**

| Assay                  | Primer/probe | Sequence (5'-3')              | Genomic location* | Amplicon |
|------------------------|--------------|-------------------------------|-------------------|----------|
| IPBCAMS assays         | Forward      | AACACAAGCTTTCGGCAGAC          | 29083-29102       | 195 bp   |
|                        | Reverse      | ACCTGTGTAGGTCAACCACG          | 29278-29259       |          |
|                        | Probe        | CAGCGCTTCAGCGTTCTTCGGAATGTCGC | 29200-29228       |          |
| N gene WHO assays      | Forward      | CACATTGGCACCCGCAATC           | 28706-28724       | 127 bp   |
|                        | Reverse      | GAGGAACGAGAAGAGGCTTG          | 28833-28814       |          |
|                        | Probe        | ACTTCCTCAAGGAACAACATTGCCA     | 28753-28777       |          |
| CCDC assays            | Forward      | GGGGAAGTTCTCCTGCTAGAAT        | 28881-28902       | 98 bp    |
|                        | Reverse      | CAGACATTTTGCTCTCAAGCTG        | 28979-28958       |          |
|                        | Probe        | TTGCTGCTGCTTGACAGATT          | 28934-28953       |          |
| IPBCAMS assays         | Forward      | ACGGTGACATGGTACCACAT          | 13760-13779       | 215 bp   |
|                        | Reverse      | CTAAGTTGGCGTATACGCGT          | 13975-13956       |          |
|                        | Probe        | TACACAATGGCAGACCTCGTCTATGC    | 13804-13829       |          |
| ORF 1b gene WHO assays | Forward      | GTGARATGGTCATGTGTGGCGG        | 15431-15452       | 99 bp    |
|                        | Reverse      | CARATGTTAAASACACTATTAGCATA    | 15530-15505       |          |
|                        | Probe        | CAGGTGGAACCTCATCAGGAGATGC     | 15470-15494       |          |
| CCDC assays            | Forward      | CCCTGTGGGTTTTACTTAA           | 13342-13362       | 118 bp   |
|                        | Reverse      | ACGATTGTGCATCAGCTGA           | 13460-13442       |          |
|                        | Probe        | CCGTCTGCGGTATGTGGAAAGGTTATGG  | 13377-13404       |          |

Numbering according to a reference genome of SARS-CoV-2 (MN908947.3)

**Table 2. Reproducibility (Coefficient of Variation, %) of the three qRT-PCR assays**

| Assay                |                |             | Copy number of RNA transcript |                 |                 |                 |                 |                 |
|----------------------|----------------|-------------|-------------------------------|-----------------|-----------------|-----------------|-----------------|-----------------|
|                      |                |             | $1 \times 10^6$               | $1 \times 10^5$ | $1 \times 10^4$ | $1 \times 10^3$ | $1 \times 10^2$ | $1 \times 10^1$ |
| N gene<br>assay      | IPBCAMS assays | Intra-assay | 0.52*                         | 1.33            | 0.37            | 0.46            | 0.20            | 1.25            |
|                      |                | Inter-assay | 1.06                          | 2.45            | 1.49            | 1.32            | 1.37            | 1.45            |
|                      | WHO assays     | Intra-assay | 1.08                          | 1.19            | 1.12            | 0.87            | 0.46            | 5.09            |
|                      |                | Inter-assay | 7.59                          | 2.94            | 2.78            | 6.60            | 0.96            | 3.77            |
|                      | CCDC assays    | Intra-assay | 0.52                          | 0.54            | 0.27            | 0.74            | 0.41            | 1.97            |
|                      |                | Inter-assay | 1.56                          | 1.20            | 5.51            | 1.00            | 1.40            | 2.89            |
| ORF 1b gene<br>assay | IPBCAMS assays | Intra-assay | 0.73                          | 0.26            | 1.10            | 1.30            | 4.45            | 3.36            |
|                      |                | Inter-assay | 4.66                          | 3.85            | 2.77            | 2.17            | 5.12            | 3.50            |
|                      | WHO assays     | Intra-assay | 0.57                          | 0.47            | 0.88            | 0.41            | 0.29            | 1.76            |
|                      |                | Inter-assay | 1.57                          | 0.30            | 0.87            | 0.69            | 0.55            | 1.23            |
|                      | CCDC assays    | Intra-assay | 1.66                          | 0.78            | 0.71            | 0.92            | 2.45            | 6.52            |
|                      |                | Inter-assay | 0.52                          | 0.54            | 0.27            | 0.74            | 0.41            | 1.97            |

259 The coefficient of variation was calculated by standard deviation of the Ct values of a RNA dilution divided by the mean Ct values of the same  
 260 RNA dilution.  
 261

262

263

264

**Table 3. Efficiency of the three qRT-PCR assays**

| Assay              | Template                          | Mean Ct values at quantified copy number of RNA transcript |                   |                   |                   |                   |                   | Slope <sup>a</sup> | Efficiency (%) <sup>b</sup> |
|--------------------|-----------------------------------|------------------------------------------------------------|-------------------|-------------------|-------------------|-------------------|-------------------|--------------------|-----------------------------|
|                    |                                   | 1×10 <sup>6</sup>                                          | 1×10 <sup>5</sup> | 1×10 <sup>4</sup> | 1×10 <sup>3</sup> | 1×10 <sup>2</sup> | 1×10 <sup>1</sup> |                    |                             |
| IPBCAMS assays     | RNA transcript <sup>d</sup> alone | 17.63±0.09 <sup>c</sup>                                    | 21.99±0.29        | 24.08±0.09        | 28.25±0.13        | 31.00±0.06        | 33.73±0.25        | -3.19              | 105.82                      |
|                    | RNA transcript + other viruses    | 19.40±0.19                                                 | 22.40±0.04        | 26.38±0.09        | 29.98±0.07        | 32.17±0.28        | 34.51±0.26        | -3.10              | 110.17                      |
| N gene WHO assays  | RNA transcript alone              | 18.44±0.19                                                 | 22.65±0.27        | 26.78±0.32        | 29.60±0.26        | 32.68±0.15        | 33.97±1.73        | -3.16              | 107.23                      |
|                    | RNA transcript + other viruses    | 19.51±0.15                                                 | 24.83±0.36        | 26.59±0.29        | 29.62±0.54        | 32.62±0.70        | 34.19±0.51        | -2.85              | 124.32                      |
| CCDC assays        | RNA transcript alone              | 17.17±0.09                                                 | 20.71±0.11        | 23.94±0.07        | 27.57±0.20        | 30.37±0.12        | 33.53±0.50        | -3.27              | 102.21                      |
|                    | RNA transcript + other viruses    | 18.93±0.16                                                 | 23.79±0.20        | 25.66±0.23        | 29.58±0.52        | 31.92±0.16        | 33.81±0.87        | -2.93              | 119.43                      |
| IPBCAMS ORF assays | RNA transcript alone              | 18.64±0.14                                                 | 22.20±0.06        | 25.73±0.28        | 28.83±0.37        | 31.90±1.42        | 34.22±1.15        | -3.15              | 107.71                      |
|                    | RNA transcript + other viruses    | 19.45±0.06                                                 | 22.98±0.13        | 25.88±0.17        | 29.37±0.12        | 32.83±0.40        | 34.65±2.12        | -3.12              | 109.18                      |
| 1b gene WHO assays | RNA transcript alone              | 18.51±0.11                                                 | 21.60±0.10        | 25.05±0.22        | 28.27±0.12        | 30.78±0.09        | 32.57±0.57        | -2.89              | 121.83                      |
|                    | RNA transcript + other viruses    | 19.46±0.09                                                 | 22.58±0.13        | 25.75±0.19        | 28.20±0.20        | 30.03±0.70        | 33.04±0.14        | -2.65              | 138.43                      |
| assay CCDC assays  | RNA transcript alone              | 18.80±0.31                                                 | 21.96±0.17        | 24.76±0.18        | 28.06±0.26        | 32.47±0.79        | 36.16±2.36        | -3.48              | 93.80                       |
|                    | RNA transcript + other viruses    | 18.67±0.04                                                 | 21.54±0.11        | 24.79±0.03        | 28.28±0.04        | 31.09±0.98        | 35.33±0.59        | -3.30              | 100.92                      |

265 <sup>a</sup> Slope was generated by fitting of the scatter with Excel 2010.

266 <sup>b</sup> Efficiency =  $10^{(-1/\text{slope})} - 1$ .

267 <sup>c</sup> Values shown are the mean of triplicate samples ± standard deviation.

268 <sup>d</sup> “RNA transcript” represents the *in vitro* transcribed RNA of the corresponding genes of SARS-CoV-2. “other viruses” represents the pooled  
 269 RNA extracted from 15 human respiratory specimens by using Trizol. “RNA transcript + other viruses” represents a 1:1 (v/v) mixture of these  
 270 two components.

**Table 4. Evaluation of the three qRT-PCR assays with clinical specimens**

| Specimen ID             | Specimen type | N gene assay |          |           | ORF 1b gene assay |          |        |
|-------------------------|---------------|--------------|----------|-----------|-------------------|----------|--------|
|                         |               | IPBCAMS      | WHO      | CCDC      | IPBCAMS           | WHO      | CCDC   |
| TS98                    | Throat swab   | 35.79        | NA       | 35.42     | NA                | NA       | NA     |
| TS101                   | Throat swab   | 33.48        | NA       | 34.24     | NA                | NA       | NA     |
| TS103                   | Throat swab   | NA           | NA       | 34.68     | NA                | NA       | NA     |
| TS105                   | Throat swab   | 31.5         | 35.76    | 31.64     | NA                | NA       | NA     |
| TS108                   | Throat swab   | 33.35        | NA       | 32.11     | 33.36             | NA       | NA     |
| TS110                   | Throat swab   | 29.99        | 31.73    | 29.1      | 33.57             | NA       | NA     |
| TS165                   | Throat swab   | 27.34        | 30.46    | 28.14     | 31.06             | 27.84    | NA     |
| TS168                   | Throat swab   | NA           | NA       | 34.97     | NA                | NA       | NA     |
| TS169                   | Throat swab   | 33.34        | NA       | 34.04     | NA                | 34.2     | NA     |
| TS187                   | Throat swab   | 34.5         | 39.2     | 33.03     | NA                | NA       | NA     |
| TS188                   | Throat swab   | 35.03        | 35.9     | 33.57     | NA                | 24.07    | NA     |
| TS189                   | Throat swab   | 31.16        | 35.43    | 31.21     | 34.04             | 30.92    | NA     |
| TS190                   | Throat swab   | 32.84        | 34.02    | 32.56     | NA                | NA       | NA     |
| TY1                     | Sputum        | 27.35        | 29.44    | 27.6      | 30.98             | 27.33    | NA     |
| TY2                     | Sputum        | 29.38        | 31.26    | 29.06     | 32.32             | 28.72    | NA     |
| TY3                     | Sputum        | 31.85        | NA       | 31.3      | 35.84             | NA       | NA     |
| TY4                     | Sputum        | 22.99        | 25.57    | 22.08     | 27.42             | 24.12    | 35.99  |
| TY6                     | Sputum        | 25.51        | 27.52    | 25.58     | 29.03             | 25.58    | 41.54  |
| TY7                     | Sputum        | 26.9         | 30.21    | 27.4      | 30.05             | 27.3     | 45.26  |
| TY8                     | Sputum        | 29.21        | 31.87    | 30.06     | 33.65             | 29.84    | NA     |
| TY9                     | Sputum        | 26.29        | 28.45    | 26.34     | 30.69             | 26.03    | 46.34  |
| XT1                     | Sputum        | 25.74        | 27.26    | 25.3      | 29.82             | 26.34    | 45.9   |
| XT2                     | Sputum        | 31.57        | NA       | 30.95     | 34.19             | NA       | NA     |
| XT3                     | Sputum        | 31.14        | NA       | 32.02     | 35.02             | NA       | NA     |
| XT4                     | Sputum        | 32.67        | NA       | 31.71     | 34.26             | NA       | NA     |
| account (%) of positive |               | 23 (92%)     | 15 (60%) | 25 (100%) | 16 (64%)          | 12 (48%) | 5(20%) |

271

272

273

274 **References**

- 275 1. Dong E, Du H, Gardner L. 2020. An interactive web-based dashboard to track  
276 COVID-19 in real time. *Lancet Infect Dis*  
277 doi:10.1016/S1473-3099(20)30120-1.
- 278 2. Corman VM, Landt O, Kaiser M, Molenkamp R, Meijer A, Chu DK, Bleicker  
279 T, Brunink S, Schneider J, Schmidt ML, Mulders DG, Haagmans BL, van der  
280 Veer B, van den Brink S, Wijsman L, Goderski G, Romette JL, Ellis J, Zambon  
281 M, Peiris M, Goossens H, Reusken C, Koopmans MP, Drosten C. 2020.  
282 Detection of 2019 novel coronavirus (2019-nCoV) by real-time RT-PCR. *Euro*  
283 *Surveill* 25.
- 284 3. Phan T. 2020. Novel coronavirus: From discovery to clinical diagnostics.  
285 *Infect Genet Evol* doi:10.1016/j.meegid.2020.104211:104211.
- 286 4. Zou L, Ruan F, Huang M, Liang L, Huang H, Hong Z, Yu J, Kang M, Song Y,  
287 Xia J, Guo Q, Song T, He J, Yen HL, Peiris M, Wu J. 2020. SARS-CoV-2  
288 Viral Load in Upper Respiratory Specimens of Infected Patients. *N Engl J*  
289 *Med* doi:10.1056/NEJMc2001737.
- 290 5. Yiwei L, Yingying W, Xinming W, Yan X, Lan C, Li G, Jianguo L, Lili R,  
291 Jianwei W. 2020. Development of two TaqMan real-time reverse  
292 transcription-PCR assays for the detection of severe acute respiratory  
293 syndrome coronavirus-2. *Biosafety and Health* doi:Accepted.
- 294 6. Huang HS, Tsai CL, Chang J, Hsu TC, Lin S, Lee CC. 2018. Multiplex PCR  
295 system for the rapid diagnosis of respiratory virus infection: systematic review  
296 and meta-analysis. *Clin Microbiol Infect* 24:1055-1063.
- 297 7. Kim HK, Oh SH, Yun KA, Sung H, Kim MN. 2013. Comparison of Anyplex  
298 II RV16 with the xTAG respiratory viral panel and Seeplex RV15 for detection  
299 of respiratory viruses. *J Clin Microbiol* 51:1137-41.
- 300 8. Wu X, Cai Y, Huang X, Yu X, Zhao L, Wang F, Li Q, Gu S, Xu T, Li Y, Lu B,  
301 Zhan Q. 2020. Co-infection with SARS-CoV-2 and Influenza A Virus in  
302 Patient with Pneumonia, China. *Emerg Infect Dis* 26.
- 303 9. Touzard-Romo F, Tape C, Lonks JR. 2020. Co-infection with SARS-CoV-2  
304 and Human Metapneumovirus. *R I Med J* (2013) 103:75-76.
- 305 10. Feng ZS, Zhao L, Wang J, Qiu FZ, Zhao MC, Wang L, Duan SX, Zhang RQ,  
306 Chen C, Qi JJ, Fan T, Li GX, Ma XJ. 2018. A multiplex one-tube nested real  
307 time RT-PCR assay for simultaneous detection of respiratory syncytial virus,  
308 human rhinovirus and human metapneumovirus. *Virol J* 15:167.
- 309 11. Resa C, Magro S, Marechal P, Barranger C, Joannes M, Mischczak F, Vabret A.  
310 2014. Development of an efficient qRT-PCR assay for quality control and  
311 cellular quantification of respiratory samples. *J Clin Virol* 60:270-5.
- 312 12. Bilgrau AE, Falgreen S, Petersen A, Kjeldsen MK, Bodker JS, Johnsen HE,  
313 Dybkaer K, Bogsted M. 2016. Unaccounted uncertainty from qPCR efficiency  
314 estimates entails uncontrolled false positive rates. *BMC Bioinformatics*  
315 17:159.

- 316 13. Zhang D, Mao H, Lou X, Pan J, Yan H, Tang H, Shu Y, Zhao Y, Cheng X, Tao  
317 H, Zhang Y, Ma X. 2018. Clinical evaluation of a panel of multiplex  
318 quantitative real-time reverse transcription polymerase chain reaction assays  
319 for the detection of 16 respiratory viruses associated with community-acquired  
320 pneumonia. Arch Virol 163:2855-2860.  
321
